# Supplementary material for: Effects of Melatonin Administration on Post-Stroke Delirium in Patients with Intracerebral Hemorrhage
Source: MDPI journal article supplement (doi:10.3390/jcm12051937), 2023-03-01
Supplement: s1 [file s1]

**Table S1.** Analysis for effect of factors on PSD duration.

|                                                  | PSD cohort              |                |
|--------------------------------------------------|-------------------------|----------------|
|                                                  | <b>PSD duration</b>     |                |
|                                                  | <u>B (95CI)</u>         | <u>p-value</u> |
| <b><u>Demographics</u></b>                       |                         |                |
| Age                                              | -0.006 (-0.015- 0.003)  | 0.206          |
| Sex                                              | -0.238 (-0.448- -0.028) | <b>0.027</b>   |
| <b><u>Risk Factors</u></b>                       |                         |                |
| HP                                               | -0.109 (-0.208- 0.427)  | 0.495          |
| DM                                               | 0.091 (-0.160- 0.342)   | 0.473          |
| HCL                                              | 0.080 (-0.157- 0.316)   | 0.504          |
| AF                                               | 0.166 (-0.052- 0.383)   | 0.134          |
| CAD                                              | 0.058 (-0.182- 0.298)   | 0.634          |
| Obesity (BMI > 30)                               | 0.434 (0.162- 0.706)    | <b>0.002</b>   |
| Chronic renal failure                            | 0.184 (-0.120- 0.488)   | 0.233          |
| Chronic hepatic failure                          | 0.262 (-0.727- 1.251)   | 0.599          |
| Smoking                                          | 0.339 (0.015- 0.662)    | <b>0.040</b>   |
| Alcohol                                          | 0.238 (-0.147- 0.623)   | 0.223          |
| Malignancy                                       | 0.329 (-0.688- 0.029)   | 0.071          |
| Depression                                       | 0.142 (-0.311- 0.595)   | 0.534          |
| MCI/Dementia                                     | -0.133 (-0.428- 0.163)  | 0.375          |
| Any kind of infections                           | 0.349 (0.141- 0.558)    | <b>0.001</b>   |
| <b><u>Baseline clinical variables/scales</u></b> |                         |                |
| NIHSS oa                                         | 0.024 (0.007- 0.041)    | <b>0.007</b>   |
| Aphasia oa                                       | 0.073 (-0.143- 0.289)   | 0.505          |
| ICH-score before the ICH                         | 0.077 (-0.039- 0.194)   | 0.189          |
| mRS oa                                           | -0.056 (-0.135- 0.023)  | 0.165          |
| <b><u>Etiology</u></b>                           |                         |                |
| Hypertension                                     | 0.226 (0.008- 0.444)    | <b>0.043</b>   |
| CAA                                              | -0.430 (-0.764- -0.095) | <b>0.012</b>   |
| Mass                                             | -0.336 (-0.747- 0.074)  | 0.107          |
| OAC                                              | 0.065 (-0.155- 0.285)   | 0.558          |
| Vessel Pathology                                 | NA                      | NA             |
| Other/Unknown                                    | 0.189 (-0.105- 0.483)   | 0.204          |
| <b><u>Location at baseline</u></b>               |                         |                |
| DWM                                              | 0.297 (0.093- 0.501)    | <b>0.005</b>   |
| Lobar                                            | -0.163 (-0.382- 0.056)  | 0.142          |
| Brainstem                                        | 0.495 (-0.205- 1.196)   | 0.163          |
| Cerebellum                                       | -0.322 (-0.646- 0.002)  | 0.051          |
| Left hemisphere                                  | -0.046 (-0.261- 0.168)  | 0.668          |
| Right hemisphere                                 | 0.031 (-0.183- 0.245)   | 0.773          |
| IVH oa                                           | NA                      | NA             |
| IVH extension                                    | 0.223 (0.015- 0.431)    | <b>0.036</b>   |
| <b><u>ICH Volume [cm<sup>3</sup>]</u></b>        | 0.077 (-0.039- 0.194)   | 0.189          |
| <b><u>Invasive procedures</u></b>                |                         |                |
| Surgical evacuation                              | -0.126 (-0.704- 0.452)  | 0.667          |
| EVD                                              | 0.415 (0.096- 0.734)    | <b>0.011</b>   |

B, unstandardized correlation coefficient; OR, odds ratio; CI, confidence interval; ICH, intracerebral hemorrhage; PSD, post-stroke delirium; HP; hypertension; DM, Diabetes mellitus; HCL, Hypercholesterolemia; AF, atrial fibrillation; CAD, coronary artery disease; BMI, body mass index; MCI, mild cognitive impairment; NIHSS, National Institutes of Health Stroke Scale; oa, on admission; mRS, modified Rankin Scale; CAA, cerebral amyloid angiopathy; OAC, oral anticoagulants; DWM, deep white matter; IVH, intraventricular; EVD, external ventricular drain  
Statistically significant values are given in bold

**Table S2.** Analysis for effect of factors on SU-stay duration.

|                                                  | PSD cohort              |                  | Non-PSD cohort          |                  |
|--------------------------------------------------|-------------------------|------------------|-------------------------|------------------|
|                                                  |                         |                  |                         |                  |
|                                                  | <u>B (95CI)</u>         | <u>p-value</u>   | <u>B (95CI)</u>         | <u>p-value</u>   |
| <b><u>Demographics</u></b>                       |                         |                  |                         |                  |
| Age                                              | -0.008 (-0.013- -0.003) | <b>0.002</b>     | 0.0001 (-0.004- 0.004)  | 0.932            |
| Sex                                              | -0.170 (-0.295- -0.045) | <b>0.008</b>     | 0.103 (-0.014- 0.220)   | 0.085            |
| <b><u>Risk Factors</u></b>                       |                         |                  |                         |                  |
| HP                                               | 0.187 (0.03- 0.370)     | <b>0.046</b>     | 0.222 (0.083- 0.361)    | <b>0.002</b>     |
| DM                                               | 0.036 (-0.118- 0.189)   | 0.645            | 0.019 (-0.134- 0.173)   | 0.804            |
| HCL                                              | 0.047 (-0.095- 0.190)   | 0.509            | 0.055 (-0.086- 0.195)   | 0.443            |
| AF                                               | 0.045 (-0.088- 0.178)   | 0.501            | 0.034 (-0.101- 0.168)   | 0.622            |
| CAD                                              | 0.023 (-0.121- 0.168)   | 0.751            | 0.155 (-0.002- 0.312)   | 0.053            |
| Obesity (BMI > 30)                               | 0.288 (0.133- 0.433)    | <b>&lt;0.001</b> | 0.039 (-0.188- 0.110)   | 0.610            |
| Chronic renal failure                            | 0.157 (-0.027- 0.341)   | 0.094            | 0.140 (-0.042- 0.322)   | 0.130            |
| Chronic hepatic failure                          | 0.066 (-0.541- 0.673)   | 0.830            | -0.072 (-0.432- 0.289)  | 0.695            |
| Smoking                                          | 0.246 (0.058- 0.433)    | <b>0.011</b>     | 0.094 (-0.058- 0.247)   | 0.225            |
| Alcohol                                          | 0.218 (-0.001- 0.437)   | 0.051            | -0.078 (-0.292- 0.135)  | 0.470            |
| Malignancy                                       | -0.336 (-0.548- -0.124) | <b>0.002</b>     | -0.242 (-0.409- -0.076) | <b>0.005</b>     |
| Depression                                       | 0.061 (-0.217- 0.339)   | 0.437            | 0.117 (-0.140- 0.375)   | 0.369            |
| MCI/Dementia                                     | -0.101 (-0.276- 0.074)  | 0.253            | -0.197 (-0.435- 0.060)  | 0.132            |
| Any kind of infections                           | 0.278 (0.158- 0.339)    | <b>&lt;0.001</b> | 0.347 (0.242- 0.452)    | <b>&lt;0.001</b> |
| <b><u>Baseline clinical variables/scales</u></b> |                         |                  |                         |                  |
| NIHSS oa                                         | 0.011 (0.001- 0.022)    | <b>0.037</b>     | 0.010 (0.001- 0.020)    | <b>0.035</b>     |
| Aphasia oa                                       | 0.014 (-0.118- 0.146)   | 0.834            | 0.168 (0.043- 0.293)    | <b>0.009</b>     |
| ICH-score oa                                     | 0.001 (-0.069- 0.072)   | 0.969            | 0.092 (0.045- 0.140)    | <b>&lt;0.001</b> |
| mRS before the ICH                               | -0.057 (-0.103- -0.010) | <b>0.018</b>     | -0.028 (-0.078- 0.022)  | 0.267            |
| <b><u>Etiology</u></b>                           |                         |                  |                         |                  |
| Hypertension                                     | 0.150 (0.019- 0.281)    | <b>0.025</b>     | 0.160 (0.046- 0.273)    | <b>0.006</b>     |
| CAA                                              | -0.134 (-0.335- 0.067)  | 0.188            | 0.032 (-0.212- 0.277)   | 0.794            |
| Mass                                             | -0.344 (-0.588- -0.099) | <b>0.006</b>     | -0.252 (-0.462- -0.041) | <b>0.019</b>     |
| OAC                                              | 0.014 (-0.118- 0.146)   | 0.834            | 0.119 (-0.011- 0.249)   | 0.073            |
| Vessel Pathology                                 | NA                      | NA               | -0.079 (-0.279- 0.120)  | 0.433            |
| Other/Unknown                                    | 0.082 (-0.099- 0.262)   | 0.372            | -0.058 (-0.205- 0.089)  | 0.437            |
| <b><u>Location at baseline</u></b>               |                         |                  |                         |                  |
| DWM                                              | 0.146 (0.021- 0.271)    | <b>0.023</b>     | 0.043 (-0.074- 0.161)   | 0.468            |
| Lobar                                            | -0.081 (-0.212- 0.051)  | 0.228            | -0.075 (-0.195- 0.044)  | 0.214            |

|                                    |                         |                  |                        |                  |
|------------------------------------|-------------------------|------------------|------------------------|------------------|
| Brainstem                          | 0.324 (-0.103- 0.750)   | 0.135            | 0.147 (-0.076- 0.369)  | 0.175            |
| Cerebellum                         | -0.199 (-0.397- -0.001) | <b>0.049</b>     | -0.038 (-0.204- 0.128) | 0.650            |
| Left hemisphere                    | -0.052 (-0.181- 0.077)  | 0.427            | 0.078 (-0.040- 0.196)  | 0.192            |
| Right hemisphere                   | 0.048 (-0.081- 0.177)   | 0.463            | -0.019 (-0.136- 0.097) | 0.746            |
| IVH oa                             | 0.389 (-0.213- 0.990)   | 0.202            | 0.249 (-0.164- 0.662)  | 0.235            |
| IVH extension                      | 0.226 (0.107- 0.345)    | <b>&lt;0.001</b> | 0.209 (0.086- 0.332)   | <b>&lt;0.001</b> |
| <b>ICH Volume [cm<sup>3</sup>]</b> | 0.0004 (-0.004- 0.003)  | 0.802            | 0.001 (-0.002- 0.003)  | 0.546            |
| <b>Invasive procedures</b>         |                         |                  |                        |                  |
| Surgical evacuation                | -0.239 (-0.590- 0.112)  | 0.179            | 0.376 (0.208- 0.544)   | <b>&lt;0.001</b> |
| EVD                                | 0.402 (0.218- 0.585)    | <b>&lt;0.001</b> | 0.461 (0.269- 0.653)   | <b>&lt;0.001</b> |

B; unstandardized correlation coefficient; OR, odds ratio; CI, confidence interval; ICH, intracerebral hemorrhage; PSD, post-stroke delirium; HP; hypertension; DM, Diabetes mellitus; HCL, Hypercholesterolemia; AF, atrial fibrillation; CAD, coronary artery disease; BMI, body mass index; MCI, mild cognitive impairment; NIHSS, National Institutes of Health Stroke Scale; oa, on admission; mRS, modified Rankin Scale; CAA, cerebral amyloid angiopathy; OAC, oral anticoagulants; DWM, deep white matter; IVH, intraventricular; EVD, external ventricular drain

Statistically significant values are given in bold

**Table S3.** Post-ICH without PSD patients' characteristics treated with melatonin vs. the control cohort after propensity matching.

| Patients Characteristics                         | Melatonin treated<br>n=62 | Control<br>Cohort<br>n=87 | P-value                  |
|--------------------------------------------------|---------------------------|---------------------------|--------------------------|
| <b><u>Demographics</u></b>                       |                           |                           |                          |
| Age, y median, (IQR)                             | 70.00 (19.00)             | 72.00 (22.00)             | 0.764 <sup>^</sup>       |
| Sex n (%)                                        |                           |                           | 0.835 <sup>*</sup>       |
| Male                                             | 36 (58.1)                 | 52 (59.8)                 |                          |
| Female                                           | 26 (41.9)                 | 35 (40.2)                 |                          |
| <b><u>Risk Factors</u></b> n (%)                 |                           |                           |                          |
| HP                                               | 50 (80.6)                 | 68 (78.2)                 | 0.713 <sup>*</sup>       |
| DM                                               | 7 (11.4)                  | 19 (21.8)                 | 0.094 <sup>*</sup>       |
| HCL                                              | 15 (24.2)                 | 18 (20.7)                 | 0.612 <sup>*</sup>       |
| AF                                               | 13 (21.0)                 | 24 (27.6)                 | 0.357 <sup>*</sup>       |
| CAD                                              | 11 (17.7)                 | 13 (15.1)                 | 0.669 <sup>*</sup>       |
| Obesity (BMI > 30)                               | 10 (16.1)                 | 18 (20.7)                 | 0.482 <sup>*</sup>       |
| Chronic renal failure                            | 7 (11.3)                  | 10 (11.5)                 | 0.969 <sup>*</sup>       |
| Chronic hepatic failure                          | 1 (1.6)                   | 3 (3.4)                   | 0.494 <sup>*</sup>       |
| Smoking                                          | 8 (12.9)                  | 18 (20.7)                 | 0.217 <sup>*</sup>       |
| Alcohol                                          | 3 (4.8)                   | 9 (10.3)                  | 0.223 <sup>*</sup>       |
| Malignancy                                       | 9 (14.5)                  | 11 (12.6)                 | 0.741 <sup>*</sup>       |
| Depression                                       | 4 (6.5)                   | 4 (4.6)                   | 0.621 <sup>*</sup>       |
| Cognition                                        |                           |                           | 0.783 <sup>*#</sup>      |
| Healthy                                          | 59 (95.2)                 | 80 (94.1)                 |                          |
| MCI                                              | 3 (4.8)                   | 5 (5.9)                   |                          |
| Dementia                                         | 0 (0.0)                   | 0 (0.0)                   |                          |
| Any kind of infections                           | 22 (35.5)                 | 37 (42.5)                 | 0.386 <sup>*</sup>       |
| <b><u>Baseline clinical variables/scales</u></b> |                           |                           |                          |
| NIHSS oa median (IQR)                            | 3.00 (9.00)               | 5.00 (9.00)               | <b>0.044<sup>^</sup></b> |
| Aphasia oa n (%)                                 | 18 (29.0)                 | 26 (29.9)                 | 0.910 <sup>*</sup>       |

|                                           |              |              |                          |
|-------------------------------------------|--------------|--------------|--------------------------|
| ICH-score oa median (IQR)                 | 1.00 (1.00)  | 1.00 (1.00)  | <b>0.008<sup>^</sup></b> |
| mRS before the ICH median (IQR)           | 0.0 (1.00)   | 0.00 (2.00)  | <b>0.020<sup>^</sup></b> |
| <b><u>Etiology</u></b>                    |              |              |                          |
| Hypertension                              | 30 (48.3)    | 48 (55.2)    | 0.414*                   |
| CAA                                       | 5 (8.1)      | 4 (4.6)      | 0.381*                   |
| Mass                                      | 7 (11.3)     | 5 (5.7)      | 0.220*                   |
| OAC                                       | 18 (29.0)    | 22 (25.3)    | 0.611*                   |
| Vessel Pathology                          | 4 (6.5)      | 10 (11.5)    | 0.298*                   |
| Other/Unknown                             | 16 (25.8)    | 13 (14.9)    | 0.099*                   |
| <b><u>Location at baseline</u></b>        |              |              |                          |
| DWM                                       | 22 (36.7)    | 43 (49.7)    | 0.126*                   |
| Lobar                                     | 27 (43.5)    | 30 (34.5)    | 0.262*                   |
| Brainstem                                 | 3 (4.8)      | 8 (9.2)      | 0.307*                   |
| Cerebellum                                | 9 (14.5)     | 12 (14.0)    | 0.923*                   |
| Left hemisphere                           | 36 (58.1)    | 52 (59.8)    | 0.835*                   |
| Right hemisphere                          | 29 (46.8)    | 43 (49.4)    | 0.750*                   |
| IVH oa                                    | 0 (0.0)      | 3 (3.4)      | 0.140*                   |
| IVH extension                             | 12 (19.4)    | 32 (36.8)    | <b>0.022*</b>            |
| <b><u>ICH Volume [cm<sup>3</sup>]</u></b> | 7.00 (13.00) | 7.00 (20.00) | 0.558 <sup>^</sup>       |
| <b><u>Invasive procedures</u> n (%)</b>   |              |              |                          |
| Surgical evacuation                       | 7 (11.3)     | 11 (12.6)    | 0.803*                   |
| EVD                                       | 4 (6.5)      | 9 (10.3)     | 0.406*                   |

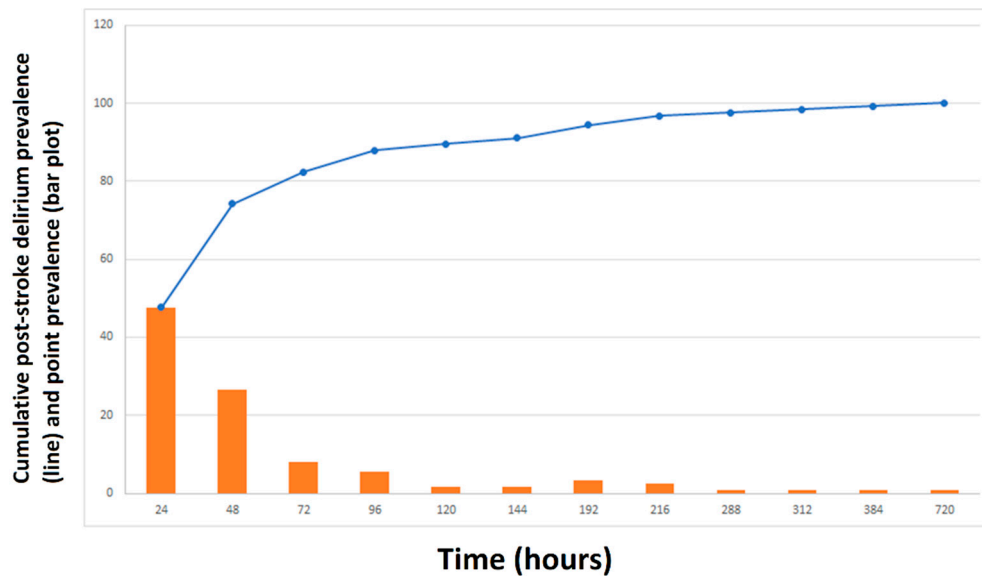

Figure S1. Cumulative post-stroke delirium prevalence (line) and point prevalence (bar plot).

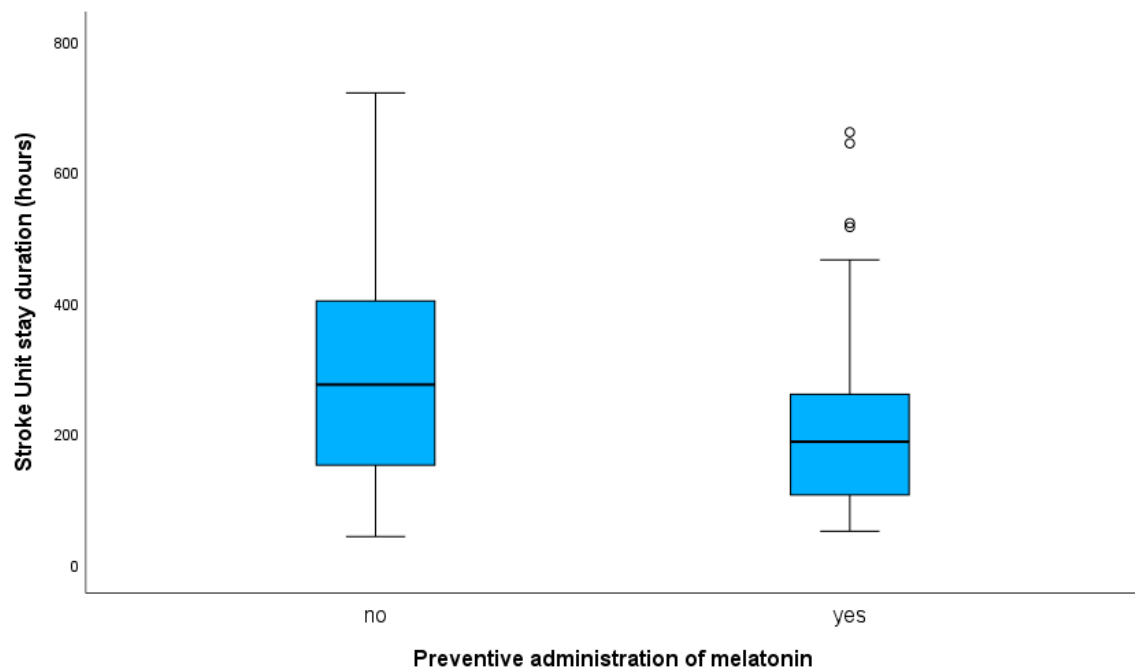

**Figure S2.** Box plots presenting data for stroke unit stay duration (hours) in respect to administration (or not) of melatonin in post-intracerebral hemorrhage patients with post-stroke delirium, who did not die during hospitalization. In the box plot, the black line within the box marks indicates the median, the boundary of the box closest to zero indicates the 1st quartile, and the boundary of the box farthest from zero indicates the 3rd quartile. Outliers with values more than 1.5 IQRs but less than 3 IQRs from the end of the box, denoted with a circle (o). Whiskers above and below the box indicate max and min values respectively, not including outliers. Median stroke unit stay duration of post-stroke delirium patients receiving melatonin was 187 hours, and 274 hours in the control group (p-value for Mann-Whitney U test=0.051).

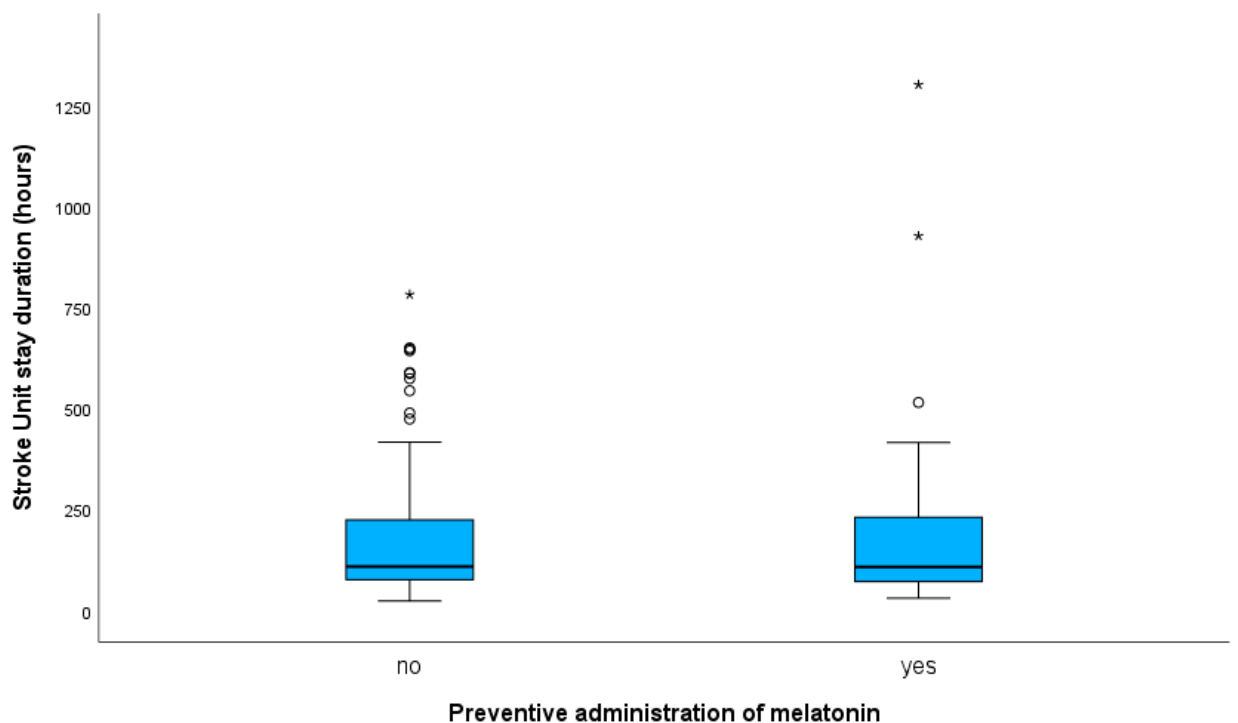

**Figure S3.** Box plots presenting data for stroke unit stay duration (hours) with respect to administration (or not) of melatonin in post-intracerebral hemorrhage patients without post-stroke delirium. In the box plot, the black line within the box marks indicates the median, the boundary of the box closest to zero indicates the 1st quartile, and the boundary of the box farthest from zero indicates the 3rd quartile. Outliers with values more than 3 interquartile ranges (IQRs) from the end of the box denoted with an asterisk (\*). Outliers with values more than 1.5 IQRs but less than 3 IQRs from the end of the box, denoted with a circle (o). Whiskers above and below the box indicate max and min values respectively, not including outliers. Median stroke unit stay duration of patients without post-stroke delirium receiving melatonin was 108 hours, and 109 hours in the control group (p-value for Mann-Whitney U test=0.910).
